# Supplementary material
Source: PubMed Central journal article supplement (PMC3156166)
Supplement: 1103105108_sapp.pdf [file 1103105108_sapp.pdf]

### ***Supplemental Figure Legends***

**Figure S1 - Correlations between motifs and NFκB binding:** Each motif in JASPAR is correlated with NFκB binding; results are ranked by p-value. Statistically significant associated factors (after Bonferroni correction of  $n = 78$ ;  $p < 6.41e-4$ ) are highlighted in red, controls highlighted in blue. As in Supplemental Table 1, the raw results are reported from the JASPAR database: thus, the first four results are variants of the NFκB motif, while two different versions of the STAT1 motif also appear in the significant results.

**Figure S2 - Detail of motif-binding correlations used in this study:** Correlations between NFκB (RELA), Stat1, E2A (Hand1::Tcfe2a), IRF2, ZNF143, and CTCF.

**Figure S3 - E-value analysis:** The top predictions of interaction transcription factors are not significantly affected by varying the e-value threshold for motif search. In this study, an e-value cutoff of 1000 was used as a trade-off between increased numbers of motifs and motif degeneracy.

Supplemental  
Figure-1 Karczewski

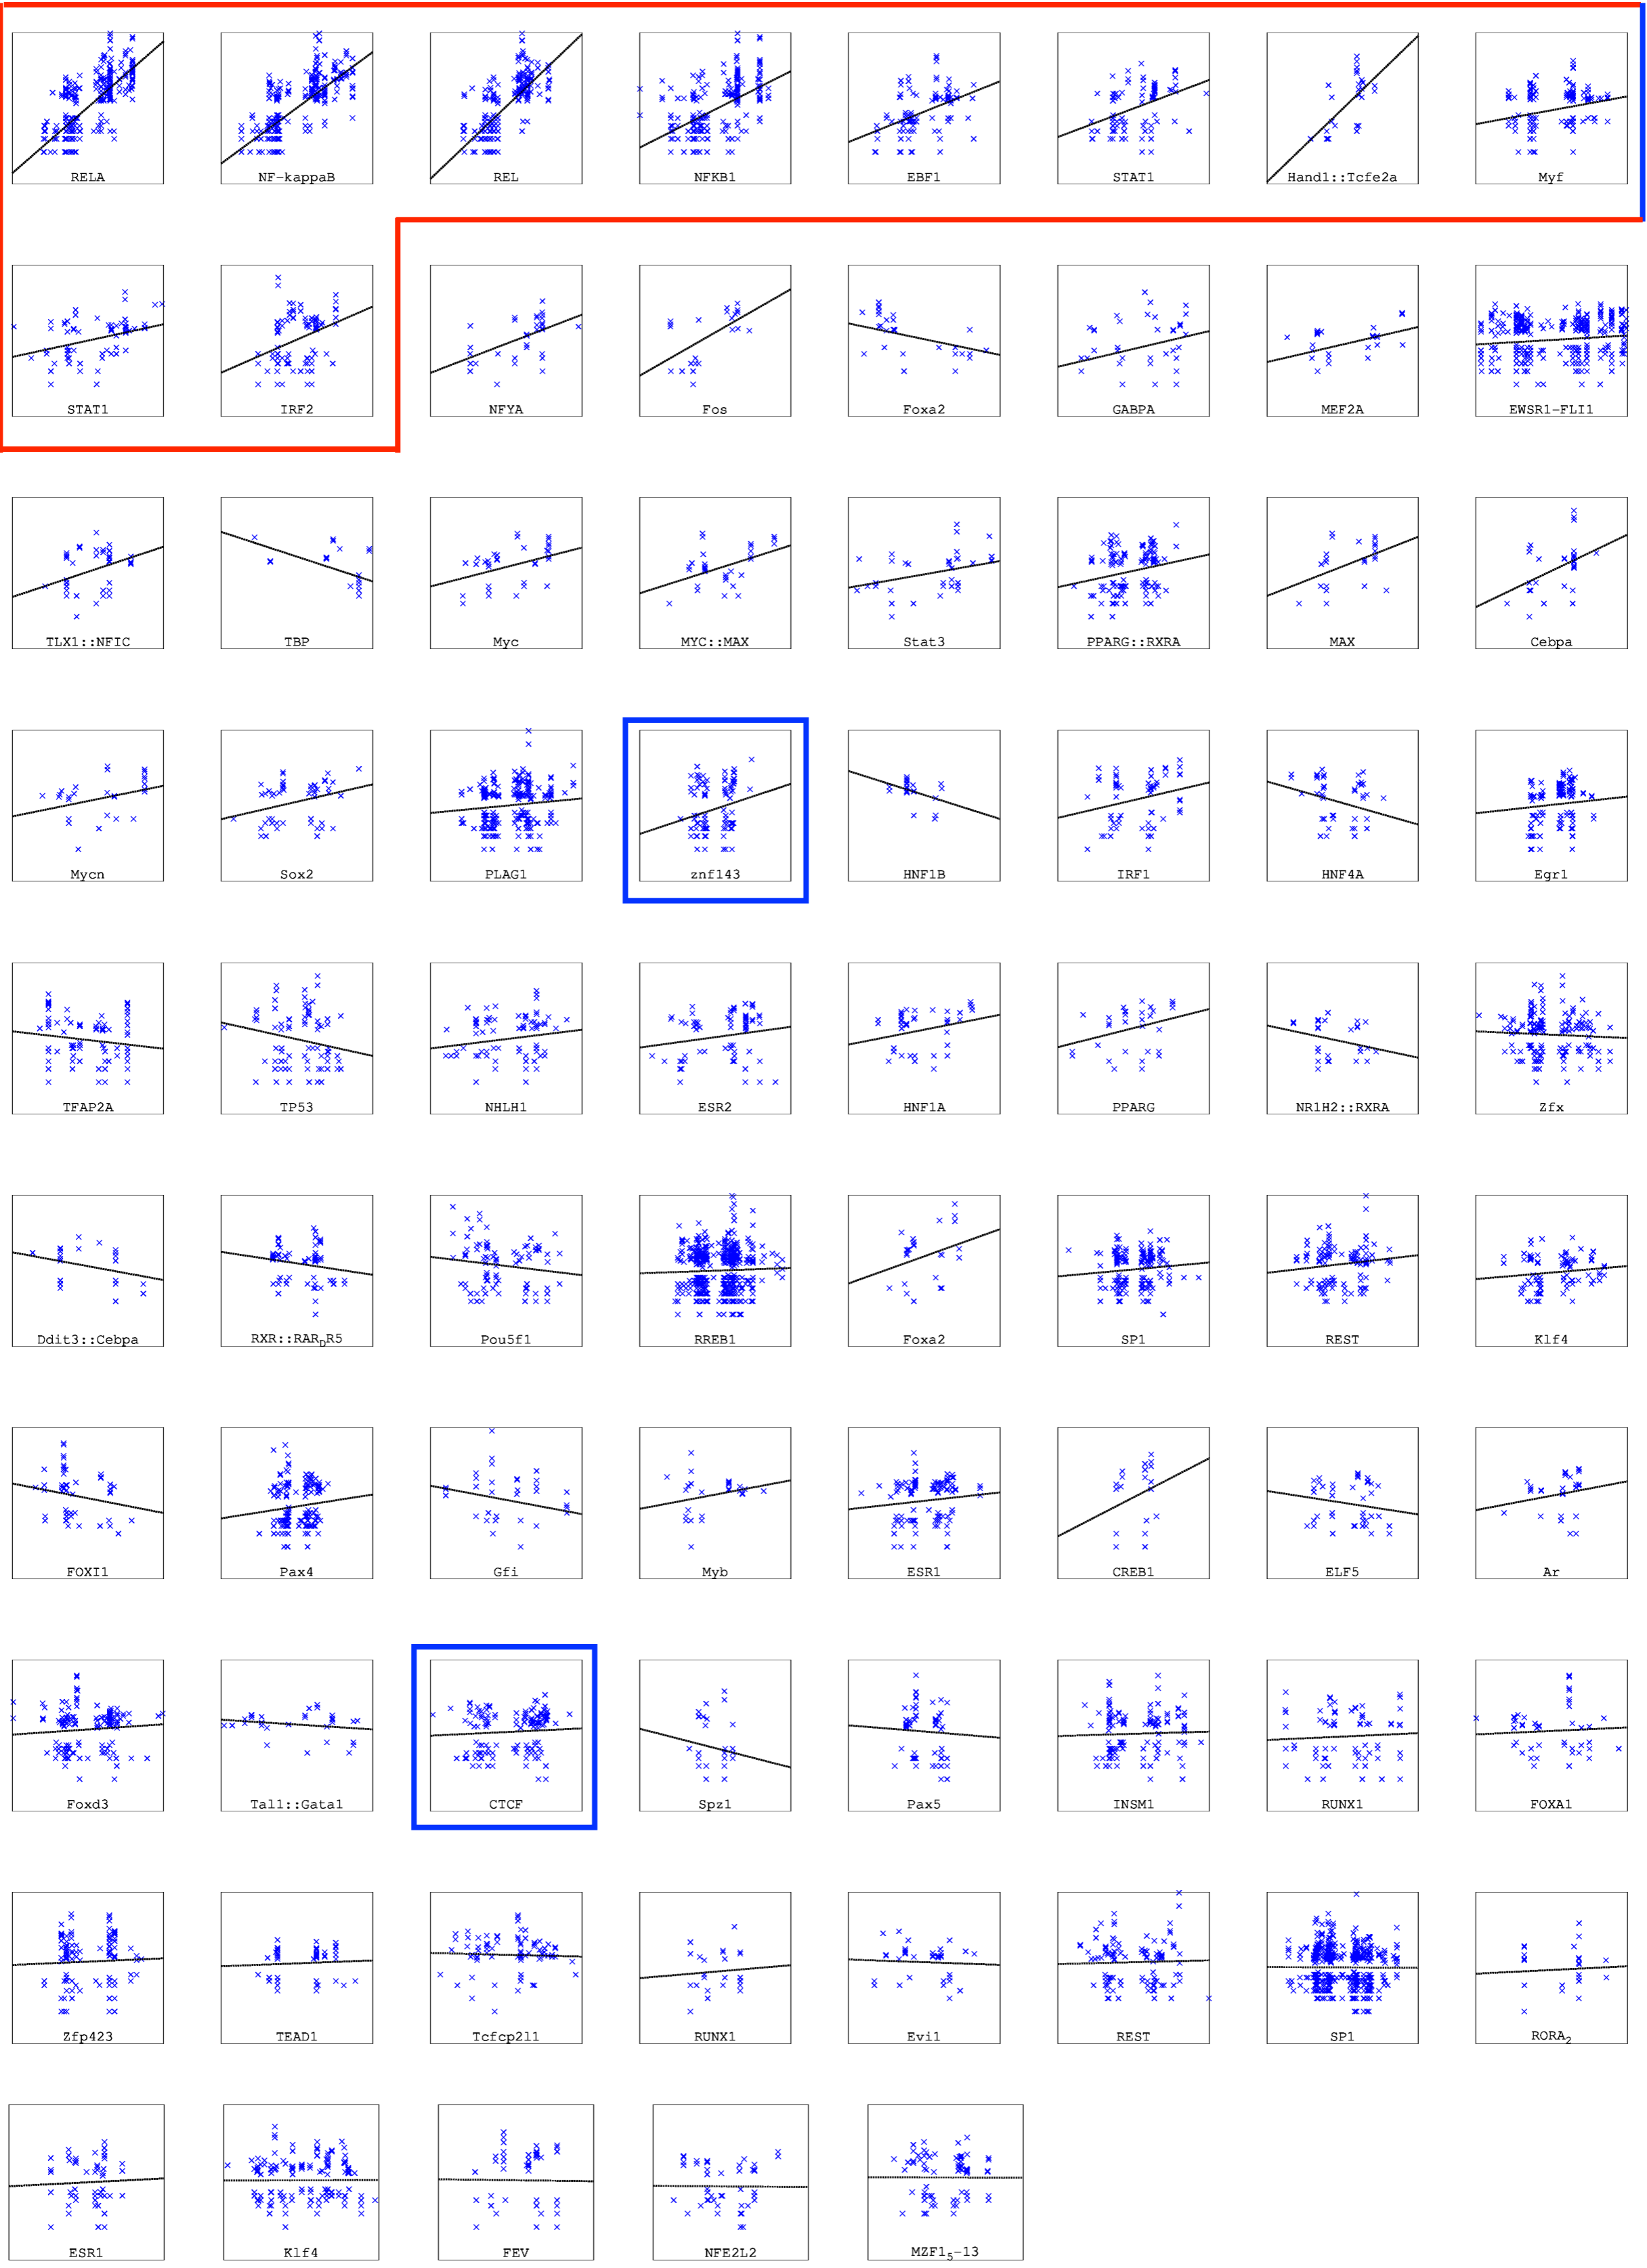

# Supplemental Figure-2 Karczewski

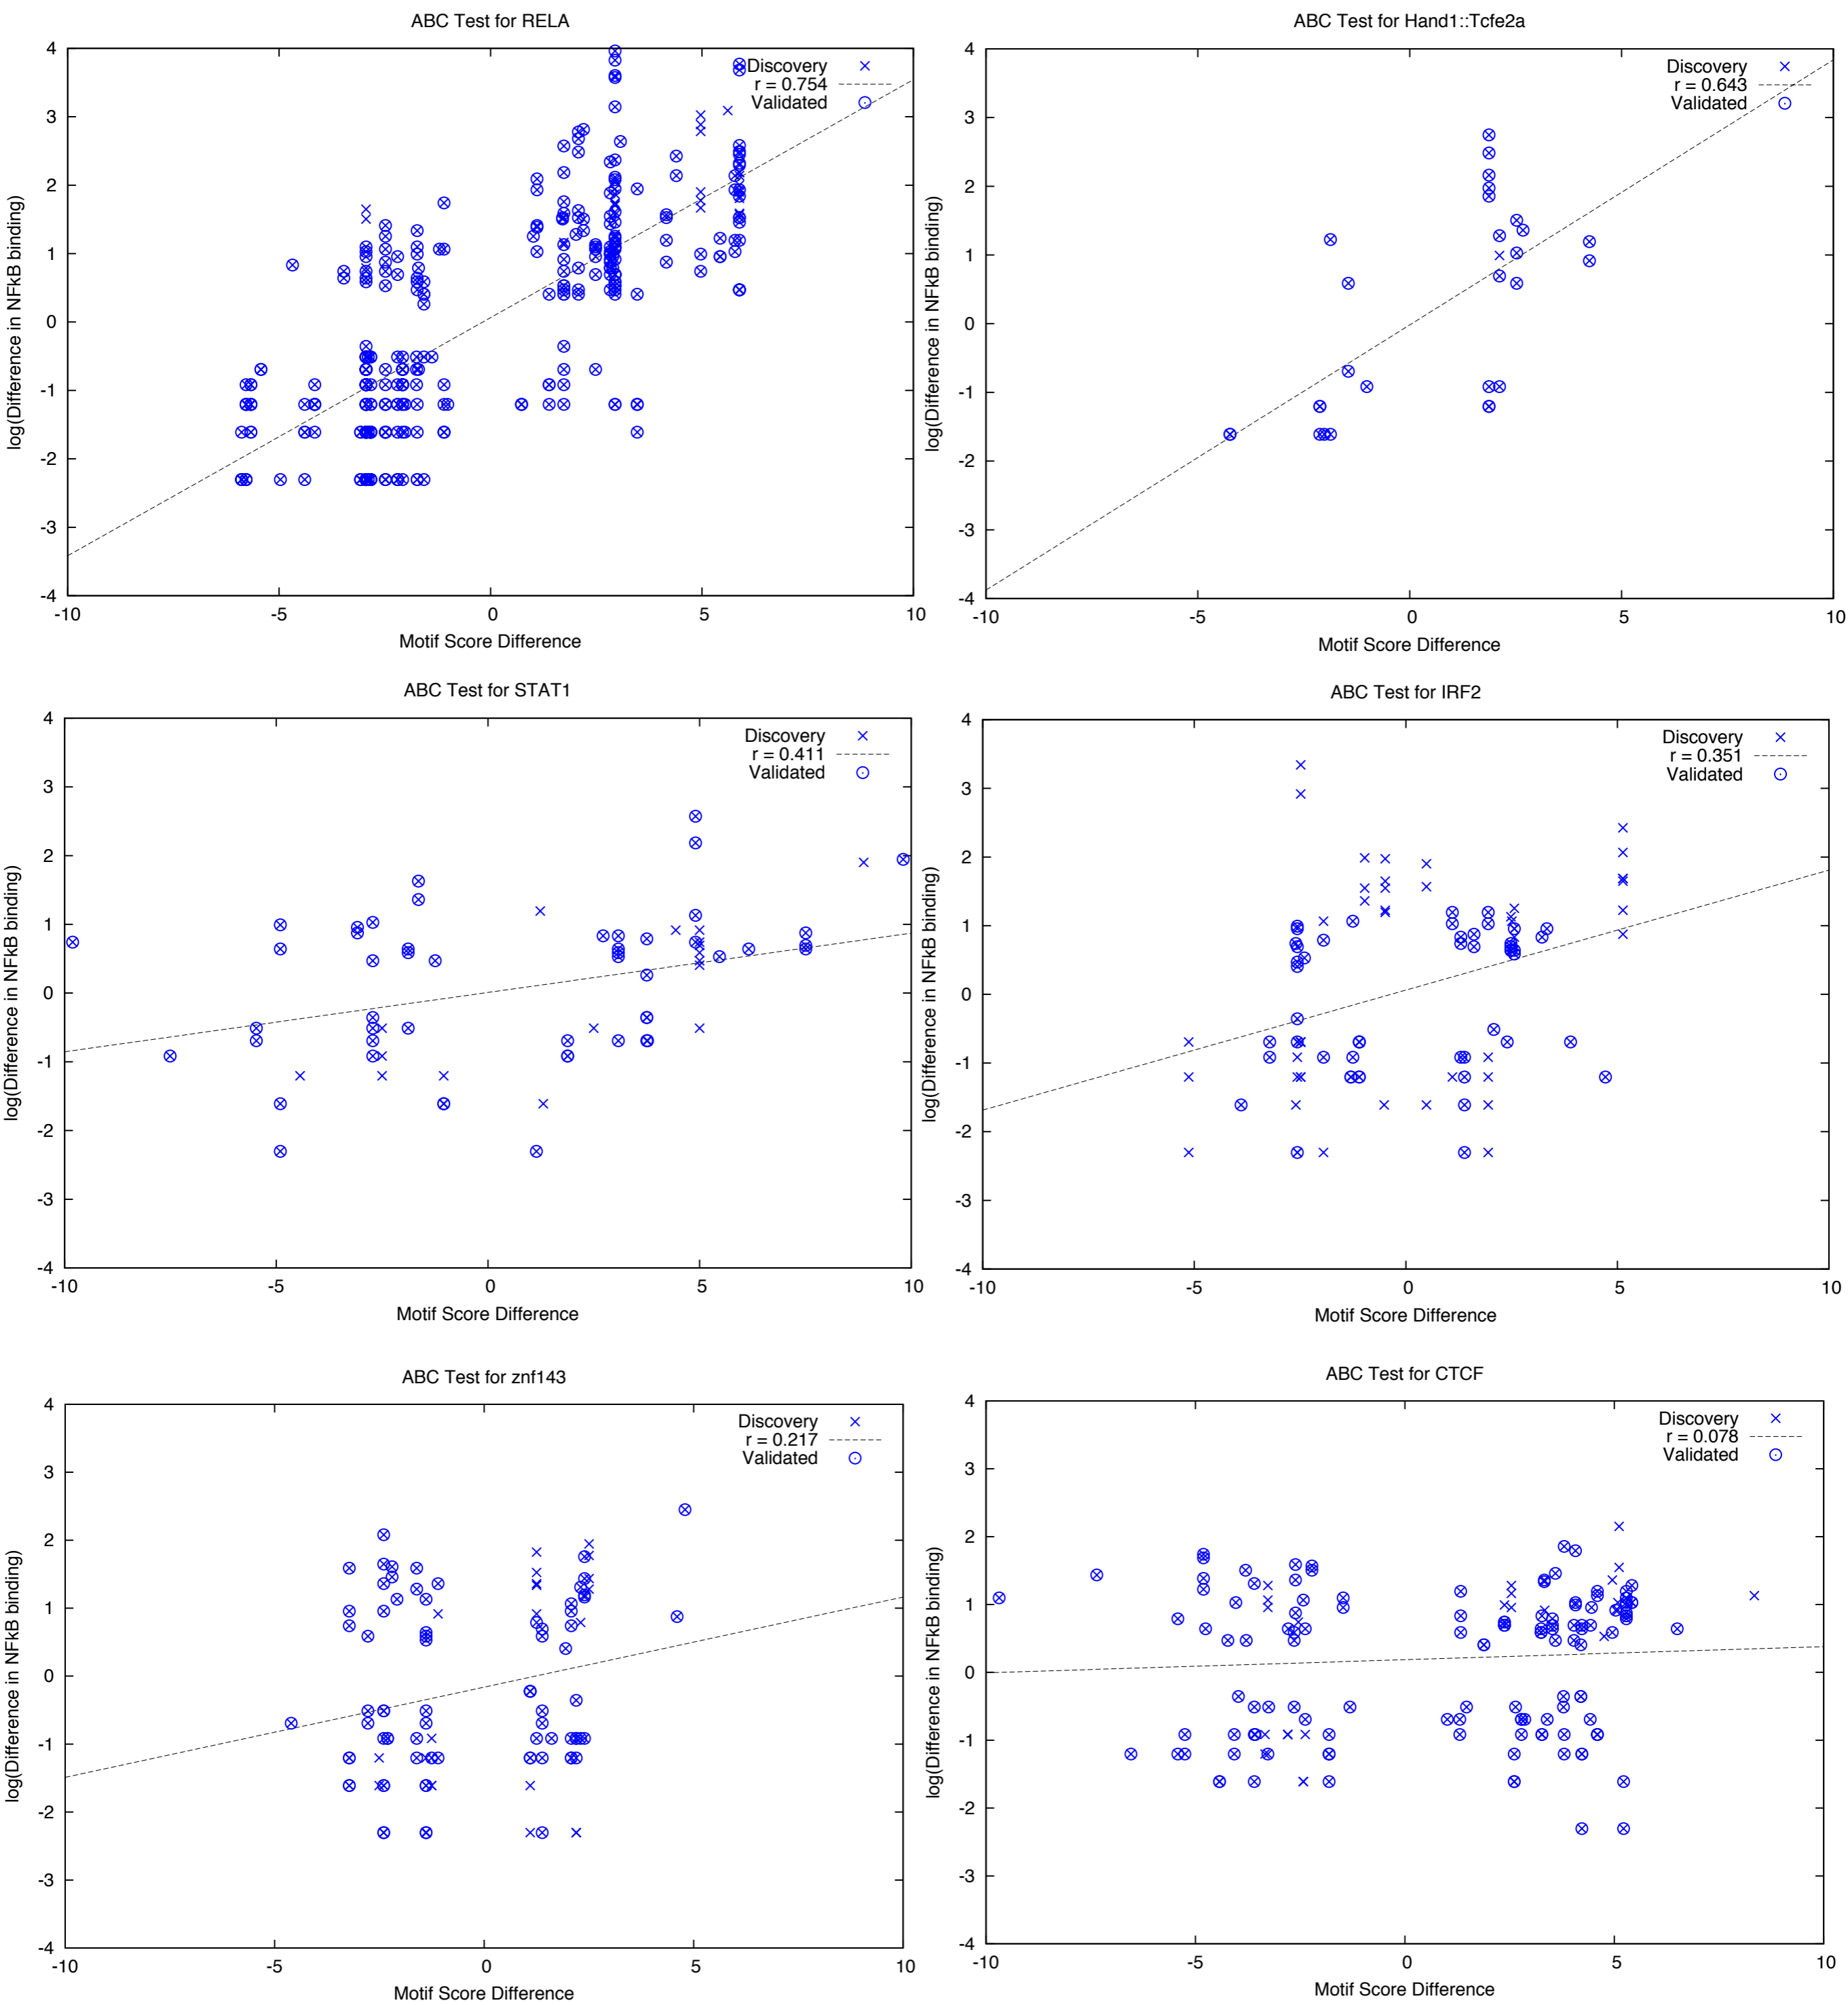

# Supplemental Figure-3 Karczewski

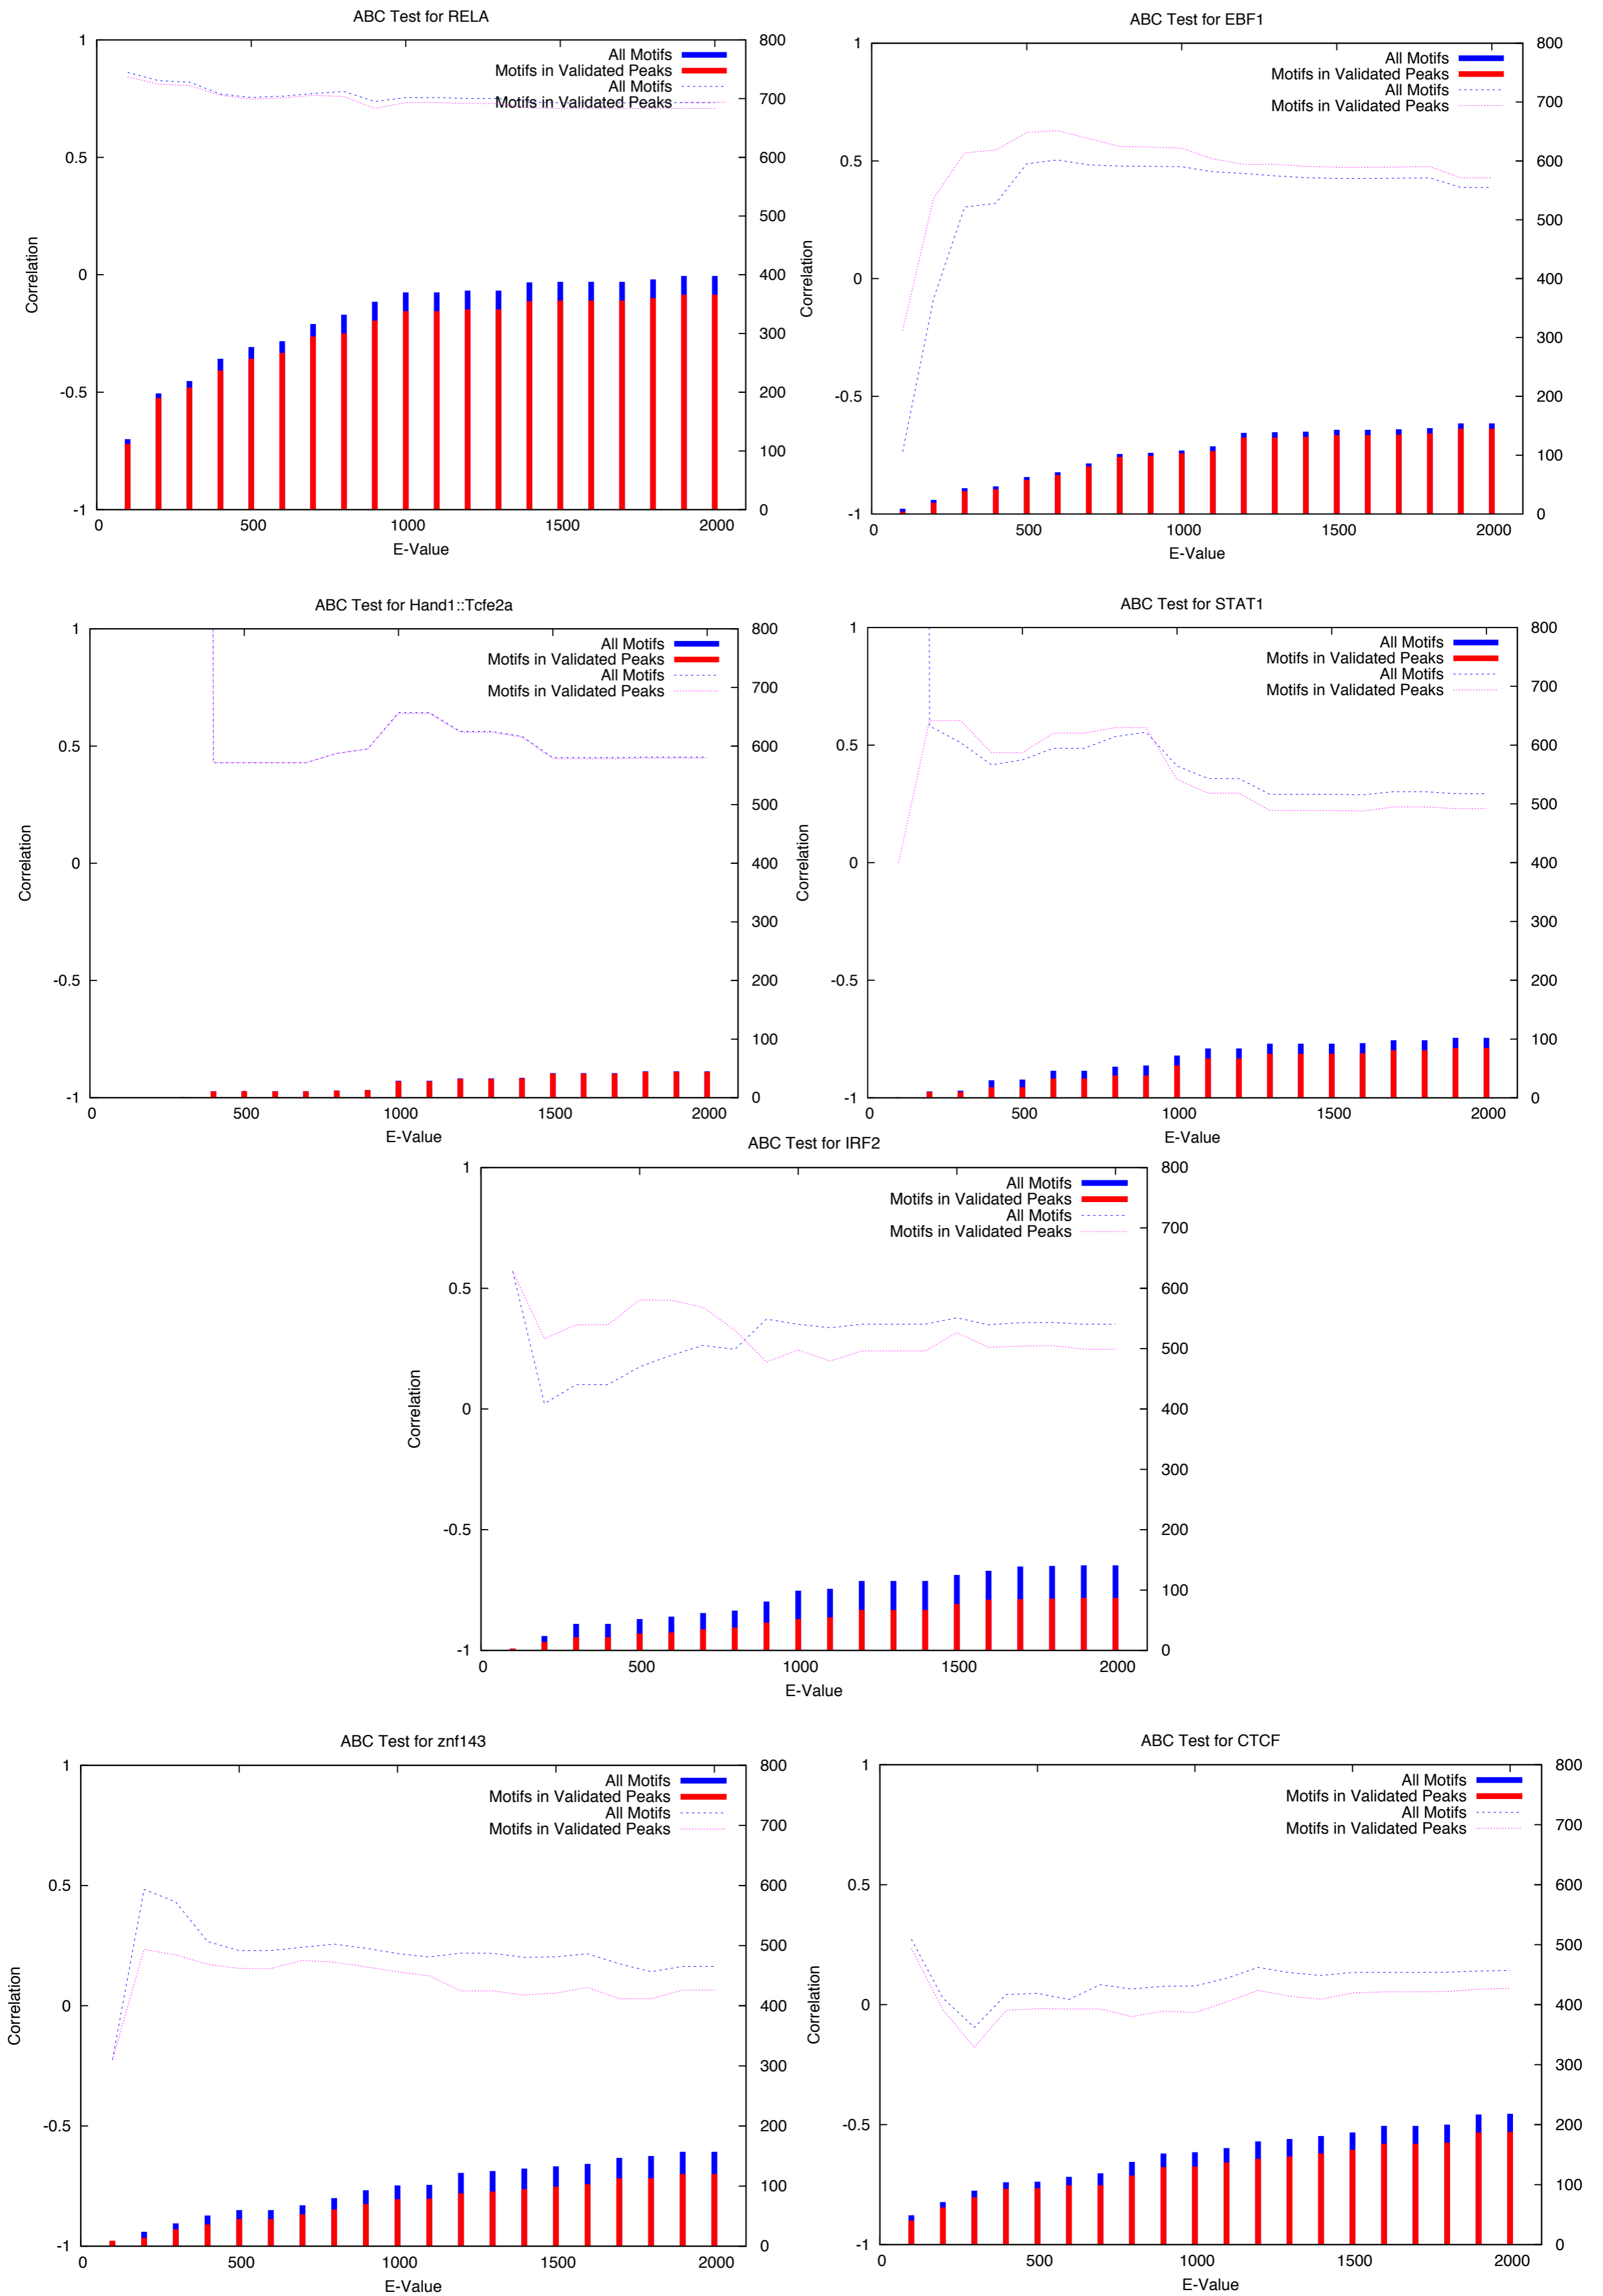

**Supplemental Table S1 - Full ALPHABIT Results:** See legend for Supplemental Figure 1. Permutation p-values < 0.05 and those for negative controls (ZNF143 and CTCF) are shown.

| Motif        | PWM (JASPAR) | Number of Comparisons | Correlation | Correlation P-value | Permutation P-value |
|--------------|--------------|-----------------------|-------------|---------------------|---------------------|
| RELA         | MA0107.1     | 370                   | 0.754383722 | 2.93E-69            | 3.60E-17            |
| NF-kappaB    | MA0061.1     | 357                   | 0.759436711 | 2.93E-68            | 1.82E-16            |
| REL          | MA0101.1     | 278                   | 0.744260489 | 2.67E-50            | 3.77E-17            |
| NFkB1        | MA0105.1     | 293                   | 0.54320458  | 6.86E-24            | 1.11E-07            |
| EBF1         | MA0154.1     | 108                   | 0.475563315 | 1.98E-07            | 0.00179532          |
| STAT1        | MA0137.1     | 96                    | 0.426075752 | 1.50E-05            | 0.00526991          |
| Hand1::Tcf2a | MA0092.1     | 29                    | 0.642601809 | 0.00017071          | 0.00389256          |
| Myf          | MA0055.1     | 164                   | 0.277858916 | 0.0003154           | 0.04383074          |
| STAT1        | MA0137.2     | 72                    | 0.410946491 | 0.00033609          | 0.01299369          |
| IRF2         | MA0051.1     | 99                    | 0.350704559 | 0.00037244          | 0.01074822          |
| NFYA         | MA0060.1     | 37                    | 0.533014539 | 0.00068244          | 0.01082954          |
| Fos          | MA0099.1     | 28                    | 0.596345713 | 0.00081056          | 0.02297914          |
| Foxa2        | MA0047.2     | 35                    | -0.53686258 | 0.00088413          |                     |
| GABPA        | MA0062.2     | 52                    | 0.435110502 | 0.00126591          | 0.02336707          |
| MEF2A        | MA0052.1     | 32                    | 0.543154758 | 0.00131652          | 0.02354683          |
| EWSR1-FLI1   | MA0149.1     | 430                   | 0.153575361 | 0.00140167          | 0.02077786          |
| TLX1::NFIC   | MA0119.1     | 54                    | 0.410167078 | 0.00206757          | 0.0071996           |
| TBP          | MA0108.1     | 28                    | -0.54759105 | 0.0025603           |                     |
| TBP          | MA0108.2     | 28                    | -0.54759105 | 0.0025603           |                     |

$\alpha = 0.05$   
(6.4E-4)

|              |          |     |             |            |            |
|--------------|----------|-----|-------------|------------|------------|
| Myc          | MA0147.1 | 40  | 0.440253501 | 0.00447045 |            |
| MYC::MAX     | MA0059.1 | 35  | 0.468737687 | 0.00450877 |            |
| Stat3        | MA0144.1 | 42  | 0.428211413 | 0.00466847 | 0.04269278 |
| PPARG::RXRA  | MA0065.2 | 144 | 0.223617916 | 0.00705506 |            |
| MAX          | MA0058.1 | 28  | 0.460591352 | 0.01364298 |            |
| Cebpa        | MA0102.1 | 33  | 0.417057218 | 0.01575189 | 0.02046079 |
| Mycn         | MA0104.2 | 34  | 0.392058218 | 0.02183427 |            |
| Sox2         | MA0143.1 | 53  | 0.308016061 | 0.02484653 |            |
| PLAG1        | MA0163.1 | 299 | 0.129253852 | 0.02541539 | 0.03417114 |
| znf143       | MA0088.1 | 101 | 0.217213312 | 0.0291157  | 0.05874526 |
| HNF1B        | MA0153.1 | 25  | -0.43319001 | 0.03053194 |            |
| IRF1         | MA0050.1 | 66  | 0.264025554 | 0.03218217 |            |
| HNF4A        | MA0114.1 | 52  | -0.2858358  | 0.03996022 |            |
| Egr1         | MA0162.1 | 126 | 0.177354289 | 0.04695172 | 0.01067904 |
| TFAP2A       | MA0003.1 | 109 | -0.19047964 | 0.04726224 |            |
| TP53         | MA0106.1 | 88  | -0.19390999 | 0.07025678 |            |
| NHLH1        | MA0048.1 | 85  | 0.192796785 | 0.07709335 |            |
| ESR2         | MA0258.1 | 75  | 0.204497945 | 0.07842332 |            |
| HNF1A        | MA0046.1 | 45  | 0.264897362 | 0.07865454 |            |
| PPARG        | MA0066.1 | 35  | 0.291920921 | 0.08883134 |            |
| NR1H2::RXRA  | MA0115.1 | 32  | -0.30213252 | 0.09282959 |            |
| Zfx          | MA0146.1 | 189 | -0.11603457 | 0.11183379 |            |
| Ddit3::Cebpa | MA0019.1 | 26  | -0.31080849 | 0.12224018 |            |
| RXR::RAR_DR5 | MA0159.1 | 73  | -0.18213552 | 0.12301565 |            |

|                 |          |     |             |            |            |
|-----------------|----------|-----|-------------|------------|------------|
| Pou5f1          | MA0142.1 | 93  | -0.15247707 | 0.14453898 |            |
| RREB1           | MA0073.1 | 605 | 0.05929357  | 0.14520069 |            |
| Foxa2           | MA0047.1 | 26  | 0.292747881 | 0.14668761 |            |
| SP1             | MA0079.1 | 189 | 0.105455032 | 0.14868856 |            |
| REST            | MA0138.1 | 128 | 0.125928745 | 0.15666134 |            |
| Klf4            | MA0039.1 | 106 | 0.134629188 | 0.16884319 |            |
| FOXI1           | MA0042.1 | 54  | -0.18947497 | 0.16998922 |            |
| Pax4            | MA0068.1 | 165 | 0.107144441 | 0.17075598 |            |
| Gfi             | MA0038.1 | 37  | -0.21896221 | 0.19290001 |            |
| Myb             | MA0100.1 | 27  | 0.248043147 | 0.21221822 |            |
| ESR1            | MA0112.2 | 112 | 0.118447258 | 0.21355506 |            |
| CREB1           | MA0018.2 | 25  | 0.252080951 | 0.22412692 |            |
| ELF5            | MA0136.1 | 43  | -0.18691363 | 0.23007352 |            |
| Ar              | MA0007.1 | 31  | 0.210650297 | 0.25534004 |            |
| Foxd3           | MA0041.1 | 156 | 0.091480154 | 0.25604832 |            |
| Tal1::Gat<br>a1 | MA0140.1 | 30  | -0.21079661 | 0.26350626 |            |
| CTCF            | MA0139.1 | 154 | 0.07788722  | 0.33698495 | 0.19092322 |
| Spz1            | MA0111.1 | 39  | -0.14563075 | 0.37637071 |            |
| Pax5            | MA0014.1 | 64  | -0.10399292 | 0.41349023 |            |
| INSM1           | MA0155.1 | 147 | 0.059475626 | 0.47424981 |            |
| RUNX1           | MA0002.2 | 93  | 0.073621813 | 0.48309502 |            |
| FOXA1           | MA0148.1 | 53  | 0.075455633 | 0.59127242 |            |
| Zfp423          | MA0116.1 | 124 | 0.045939488 | 0.6124024  |            |
| TEAD1           | MA0090.1 | 59  | 0.064506557 | 0.62740052 |            |
| Tcfcp2l1        | MA0145.1 | 87  | -0.04772017 | 0.66072208 |            |
| RUNX1           | MA0002.1 | 28  | 0.082130012 | 0.67779028 |            |

|               |          |     |             |            |
|---------------|----------|-----|-------------|------------|
| Evi1          | MA0029.1 | 43  | -0.06270672 | 0.68954525 |
| REST          | MA0138.2 | 129 | 0.035485261 | 0.68971786 |
| SP1           | MA0079.2 | 567 | -0.01613624 | 0.70141635 |
| RORA_2        | MA0072.1 | 31  | 0.068605686 | 0.71383112 |
| ESR1          | MA0112.1 | 64  | 0.041444604 | 0.74505857 |
| Klf4          | MA0039.2 | 175 | 0.008961942 | 0.90629896 |
| FEV           | MA0156.1 | 50  | -0.01113002 | 0.93885198 |
| NFE2L2        | MA0150.1 | 46  | -0.00961655 | 0.94942483 |
| MZF1_5-<br>13 | MA0057.1 | 87  | -0.00268926 | 0.98027752 |



**Supplemental Table 2 - List of Motifs used in this study**

| Chrom | Motif Start | Motif End | Peak Start | Peak End  | Factor | Validated? |
|-------|-------------|-----------|------------|-----------|--------|------------|
| 4     | 5758459     | 5758468   | 5758214    | 5758625   | EBF1   | Val        |
| 7     | 154719874   | 154719883 | 154719333  | 154722620 | EBF1   | Val        |
| 11    | 72203582    | 72203591  | 72201659   | 72204076  | EBF1   | Val        |
| 10    | 63395423    | 63395432  | 63395394   | 63396064  | EBF1   | Val        |
| 1     | 22911452    | 22911461  | 22911063   | 22911998  | EBF1   | Val        |
| 4     | 908618      | 908627    | 907838     | 909101    | EBF1   | Val        |
| 19    | 35212855    | 35212864  | 35212720   | 35213525  | EBF1   | Val        |
| 17    | 24080150    | 24080159  | 24079021   | 24080482  | EBF1   | Val        |
| 3     | 101556516   | 101556525 | 101556323  | 101556820 | EBF1   | Val        |
| 2     | 196744091   | 196744100 | 196743723  | 196745214 | EBF1   | Val        |
| 6     | 161130608   | 161130617 | 161129947  | 161131682 | EBF1   | Val        |
| 2     | 109628760   | 109628769 | 109628559  | 109629648 | EBF1   | Val        |
| 4     | 86696739    | 86696748  | 86696267   | 86697998  | EBF1   | Val        |
| 20    | 11190432    | 11190441  | 11190145   | 11190578  | EBF1   | Val        |
| 1     | 183642628   | 183642637 | 183642237  | 183642801 | EBF1   | Val        |
| 2     | 232901240   | 232901249 | 232901018  | 232901509 | EBF1   | Val        |
| 16    | 10767441    | 10767450  | 10767169   | 10767630  | EBF1   | Val        |
| 19    | 60588519    | 60588528  | 60588359   | 60589513  | EBF1   | Val        |
| 22    | 48441201    | 48441210  | 48440739   | 48441458  | EBF1   | Val        |
| 11    | 44586876    | 44586885  | 44586719   | 44588356  | EBF1   | Val        |
| 19    | 49942346    | 49942355  | 49942036   | 49944605  | EBF1   | Val        |
| 13    | 61324434    | 61324443  | 61324253   | 61324682  | EBF1   | Val        |
| 11    | 74912623    | 74912632  | 74911918   | 74913527  | EBF1   | Val        |
| 7     | 44639685    | 44639694  | 44639278   | 44640405  | EBF1   | Val        |
| 14    | 96038350    | 96038359  | 96037385   | 96039390  | EBF1   | Val        |
| 19    | 2122253     | 2122262   | 2122156    | 2123186   | EBF1   | Val        |
| 1     | 141832409   | 141832418 | 141832156  | 141832644 | EBF1   | Val        |

|    |           |           |           |           |      |     |
|----|-----------|-----------|-----------|-----------|------|-----|
| 18 | 45715054  | 45715063  | 45714783  | 45715240  | EBF1 | Val |
| 5  | 7848054   | 7848063   | 7847188   | 7848182   | EBF1 | Val |
| 11 | 68595167  | 68595176  | 68594783  | 68595246  | EBF1 |     |
| 8  | 3169504   | 3169513   | 3168502   | 3169716   | EBF1 | Val |
| 16 | 86315946  | 86315955  | 86315514  | 86316614  | EBF1 | Val |
| 12 | 120704166 | 120704175 | 120704037 | 120705128 | EBF1 | Val |
| 8  | 29286050  | 29286059  | 29285733  | 29286668  | EBF1 | Val |
| 6  | 39301950  | 39301959  | 39301856  | 39302782  | EBF1 | Val |
| 16 | 10814042  | 10814051  | 10813564  | 10814756  | EBF1 | Val |
| 16 | 4297381   | 4297390   | 4296629   | 4298195   | EBF1 | Val |
| 12 | 5665535   | 5665544   | 5665370   | 5665991   | EBF1 | Val |
| 1  | 234655005 | 234655014 | 234654848 | 234655736 | EBF1 | Val |
| 6  | 31433090  | 31433099  | 31432303  | 31433481  | EBF1 | Val |
| 9  | 83933248  | 83933257  | 83932251  | 83933285  | EBF1 | Val |
| 3  | 16529245  | 16529254  | 16526096  | 16531818  | EBF1 | Val |
| 6  | 31347833  | 31347842  | 31347151  | 31348246  | EBF1 | Val |
| 10 | 112592934 | 112592943 | 112591230 | 112593526 | EBF1 | Val |
| 17 | 8829769   | 8829778   | 8829013   | 8829854   | RELA | Val |
| 11 | 131917202 | 131917211 | 131916932 | 131917348 | RELA | Val |
| 6  | 30188970  | 30188979  | 30188560  | 30189475  | RELA | Val |
| 21 | 46498703  | 46498712  | 46497707  | 46499155  | RELA | Val |
| 1  | 93199129  | 93199138  | 93198485  | 93200283  | RELA | Val |
| 8  | 102287682 | 102287691 | 102286860 | 102288163 | RELA | Val |
| 7  | 99537102  | 99537111  | 99535785  | 99537622  | RELA | Val |
| 12 | 6431404   | 6431413   | 6430451   | 6432260   | RELA | Val |
| 2  | 45370839  | 45370848  | 45370457  | 45371303  | RELA | Val |
| 14 | 33750985  | 33750994  | 33750653  | 33751220  | RELA | Val |
| 1  | 31746898  | 31746907  | 31746821  | 31747983  | RELA | Val |
| 8  | 22988649  | 22988658  | 22987698  | 22988741  | RELA | Val |

|    |           |           |           |           |      |     |
|----|-----------|-----------|-----------|-----------|------|-----|
| 3  | 123524164 | 123524173 | 123523703 | 123524549 | RELA | Val |
| 1  | 167352150 | 167352159 | 167351711 | 167352499 | RELA | Val |
| 1  | 59648032  | 59648041  | 59647770  | 59648598  | RELA | Val |
| 11 | 30301456  | 30301465  | 30300567  | 30302137  | RELA | Val |
| 20 | 4875884   | 4875893   | 4875345   | 4876174   | RELA | Val |
| 8  | 2230515   | 2230524   | 2230386   | 2230922   | RELA |     |
| 2  | 88912551  | 88912560  | 88912352  | 88913656  | RELA |     |
| 12 | 128615577 | 128615586 | 128615243 | 128615775 | RELA | Val |
| 20 | 2730008   | 2730017   | 2729370   | 2730324   | RELA |     |
| 20 | 30087074  | 30087083  | 30085964  | 30087466  | RELA | Val |
| 20 | 30086374  | 30086383  | 30085964  | 30087466  | RELA | Val |
| 20 | 30087074  | 30087083  | 30085964  | 30087466  | RELA | Val |
| 20 | 30086374  | 30086383  | 30085964  | 30087466  | RELA | Val |
| 20 | 30087074  | 30087083  | 30085964  | 30087466  | RELA | Val |
| 20 | 30086374  | 30086383  | 30085964  | 30087466  | RELA | Val |
| 20 | 30087074  | 30087083  | 30085964  | 30087466  | RELA | Val |
| 3  | 73105156  | 73105165  | 73104882  | 73105474  | RELA | Val |
| 1  | 40014532  | 40014541  | 40014410  | 40014933  | RELA |     |
| 20 | 55478416  | 55478425  | 55478059  | 55478627  | RELA | Val |
| 17 | 52478865  | 52478874  | 52478264  | 52479238  | RELA | Val |
| 1  | 204153394 | 204153403 | 204153143 | 204153802 | RELA | Val |
| 11 | 92328918  | 92328927  | 92328739  | 92329102  | RELA | Val |
| 12 | 9711837   | 9711846   | 9711062   | 9711976   | RELA | Val |
| 4  | 86696743  | 86696752  | 86696267  | 86697998  | RELA | Val |
| 16 | 30486245  | 30486254  | 30486026  | 30486606  | RELA | Val |
| 6  | 43300242  | 43300251  | 43299741  | 43300607  | RELA | Val |
| 6  | 30002013  | 30002022  | 30001843  | 30003189  | RELA | Val |
| 5  | 106665707 | 106665716 | 106665524 | 106666460 | RELA | Val |
| 3  | 61481958  | 61481967  | 61481430  | 61482524  | RELA | Val |

|    |           |           |           |           |      |     |
|----|-----------|-----------|-----------|-----------|------|-----|
| 2  | 68445582  | 68445591  | 68445493  | 68446295  | RELA | Val |
| 10 | 109799611 | 109799620 | 109799482 | 109799811 | RELA | Val |
| 6  | 52362546  | 52362555  | 52362155  | 52363627  | RELA | Val |
| 3  | 64410036  | 64410045  | 64409766  | 64410170  | RELA | Val |
| 18 | 12981388  | 12981397  | 12980129  | 12982328  | RELA | Val |
| 7  | 92101154  | 92101163  | 92100678  | 92102785  | RELA | Val |
| 13 | 61324428  | 61324437  | 61324253  | 61324682  | RELA | Val |
| 14 | 96235354  | 96235363  | 96235005  | 96235843  | RELA | Val |
| 11 | 33358267  | 33358276  | 33358019  | 33358506  | RELA | Val |
| 3  | 120902339 | 120902348 | 120901777 | 120902729 | RELA | Val |
| 4  | 185579268 | 185579277 | 185578503 | 185580343 | RELA | Val |
| 2  | 151762184 | 151762193 | 151762001 | 151762330 | RELA |     |
| 15 | 38185227  | 38185236  | 38184035  | 38186844  | RELA | Val |
| 3  | 121482305 | 121482314 | 121482140 | 121482503 | RELA |     |
| 5  | 75601939  | 75601948  | 75601289  | 75602203  | RELA | Val |
| 10 | 7773368   | 7773377   | 7773136   | 7773582   | RELA | Val |
| 17 | 72105207  | 72105216  | 72104976  | 72105405  | RELA | Val |
| 14 | 50348849  | 50348858  | 50348665  | 50349663  | RELA | Val |
| 5  | 115131216 | 115131225 | 115130825 | 115131645 | RELA | Val |
| 1  | 12039475  | 12039484  | 12039028  | 12039547  | RELA | Val |
| 18 | 45715060  | 45715069  | 45714783  | 45715240  | RELA | Val |
| 11 | 93961693  | 93961702  | 93961338  | 93961745  | RELA | Val |
| 13 | 20797203  | 20797212  | 20797006  | 20797425  | RELA | Val |
| 12 | 50037788  | 50037797  | 50037194  | 50038231  | RELA | Val |
| 17 | 19599834  | 19599843  | 19598576  | 19600250  | RELA | Val |
| 16 | 87572338  | 87572347  | 87570670  | 87573493  | RELA | Val |
| 19 | 55112475  | 55112484  | 55111984  | 55112858  | RELA | Val |
| 1  | 25245397  | 25245406  | 25245179  | 25245669  | RELA | Val |
| 5  | 83593658  | 83593667  | 83593250  | 83594088  | RELA | Val |

|    |           |           |           |           |      |     |
|----|-----------|-----------|-----------|-----------|------|-----|
| 20 | 1422397   | 1422406   | 1422065   | 1422568   | RELA | Val |
| 1  | 66640449  | 66640458  | 66638940  | 66641036  | RELA | Val |
| 13 | 30910179  | 30910188  | 30910001  | 30910408  | RELA | Val |
| 4  | 170499353 | 170499362 | 170498843 | 170499765 | RELA | Val |
| 22 | 40675650  | 40675659  | 40675197  | 40676232  | RELA | Val |
| 22 | 40675989  | 40675998  | 40675197  | 40676232  | RELA | Val |
| 22 | 40675650  | 40675659  | 40675197  | 40676232  | RELA | Val |
| 22 | 40675989  | 40675998  | 40675197  | 40676232  | RELA | Val |
| 22 | 40675650  | 40675659  | 40675197  | 40676232  | RELA | Val |
| 22 | 40675989  | 40675998  | 40675197  | 40676232  | RELA | Val |
| 22 | 40675650  | 40675659  | 40675197  | 40676232  | RELA | Val |
| 22 | 40675989  | 40675998  | 40675197  | 40676232  | RELA | Val |
| 22 | 40675650  | 40675659  | 40675197  | 40676232  | RELA | Val |
| 22 | 40675989  | 40675998  | 40675197  | 40676232  | RELA | Val |
| 22 | 40675650  | 40675659  | 40675197  | 40676232  | RELA | Val |
| 22 | 40675989  | 40675998  | 40675197  | 40676232  | RELA | Val |
| 12 | 81923623  | 81923632  | 81923394  | 81924044  | RELA | Val |
| 6  | 14203733  | 14203742  | 14203285  | 14204303  | RELA | Val |
| 11 | 22738484  | 22738493  | 22738239  | 22738716  | RELA | Val |
| 7  | 14721653  | 14721662  | 14721463  | 14721941  | RELA | Val |
| 3  | 110283658 | 110283667 | 110282962 | 110283980 | RELA | Val |
| 6  | 32744204  | 32744213  | 32743880  | 32744639  | RELA | Val |
| 10 | 43410802  | 43410811  | 43410308  | 43411759  | RELA | Val |
| 9  | 109985329 | 109985338 | 109985026 | 109985629 | RELA | Val |
| 12 | 5665528   | 5665537   | 5665370   | 5665991   | RELA | Val |
| 7  | 26354426  | 26354435  | 26354128  | 26354936  | RELA | Val |
| 1  | 167283149 | 167283158 | 167282736 | 167283516 | RELA | Val |
| 12 | 1424302   | 1424311   | 1424096   | 1424504   | RELA | Val |
| 3  | 194099389 | 194099398 | 194098956 | 194099761 | RELA | Val |
| 3  | 14668655  | 14668664  | 14667773  | 14668908  | RELA | Val |
| 17 | 52086424  | 52086433  | 52086069  | 52086681  | RELA | Val |

|    |           |           |           |           |               |     |
|----|-----------|-----------|-----------|-----------|---------------|-----|
| 5  | 74285679  | 74285688  | 74285425  | 74285869  | RELA          | Val |
| 6  | 139463165 | 139463174 | 139462868 | 139463366 | RELA          | Val |
| 2  | 239000141 | 239000150 | 238999599 | 239000769 | RELA          | Val |
| 1  | 218460032 | 218460041 | 218459501 | 218461188 | RELA          | Val |
| 10 | 126807822 | 126807831 | 126807609 | 126808105 | RELA          |     |
| 7  | 28546237  | 28546246  | 28545634  | 28546265  | RELA          | Val |
| 11 | 62365677  | 62365691  | 62363343  | 62366755  | STAT1         | Val |
| 15 | 72274076  | 72274090  | 72273888  | 72274209  | STAT1         |     |
| 1  | 153099276 | 153099290 | 153098752 | 153100050 | STAT1         | Val |
| 5  | 108525704 | 108525718 | 108525549 | 108526035 | STAT1         |     |
| 1  | 119483879 | 119483893 | 119483483 | 119485250 | STAT1         | Val |
| 1  | 16713086  | 16713100  | 16712634  | 16713947  | STAT1         | Val |
| 2  | 91681047  | 91681061  | 91680651  | 91681705  | STAT1         |     |
| 3  | 64409990  | 64410004  | 64409766  | 64410170  | STAT1         | Val |
| 2  | 241676525 | 241676539 | 241675766 | 241676916 | STAT1         | Val |
| 16 | 31620182  | 31620196  | 31619246  | 31620655  | STAT1         | Val |
| 12 | 124485812 | 124485826 | 124485123 | 124486131 | STAT1         | Val |
| 2  | 241639358 | 241639372 | 241639327 | 241639664 | STAT1         |     |
| 11 | 117493986 | 117494000 | 117493670 | 117494224 | STAT1         |     |
| 1  | 56570387  | 56570401  | 56570315  | 56570938  | STAT1         | Val |
| 7  | 26354418  | 26354432  | 26354128  | 26354936  | STAT1         | Val |
| 11 | 117578551 | 117578565 | 117578504 | 117579062 | STAT1         |     |
| 2  | 30560655  | 30560669  | 30560420  | 30561554  | STAT1         |     |
| 15 | 91007806  | 91007820  | 91006974  | 91008103  | STAT1         | Val |
| 2  | 46306785  | 46306794  | 46306715  | 46307886  | Hand1::Tcfe2a | Val |
| 1  | 46011427  | 46011436  | 46011250  | 46011662  | Hand1::Tcfe2a | Val |
| 12 | 131107960 | 131107969 | 131107380 | 131108017 | Hand1::Tcfe2a |     |
| 12 | 108400102 | 108400111 | 108399313 | 108400182 | Hand1::Tcfe2a | Val |
| 8  | 72906478  | 72906487  | 72905491  | 72906545  | Hand1::Tcfe2a | Val |



|    |           |           |           |           |      |     |
|----|-----------|-----------|-----------|-----------|------|-----|
| 21 | 38515921  | 38515938  | 38515233  | 38516017  | IRF2 |     |
| 21 | 38515995  | 38516012  | 38515233  | 38516017  | IRF2 |     |
| 21 | 38515921  | 38515938  | 38515233  | 38516017  | IRF2 |     |
| 21 | 38515995  | 38516012  | 38515233  | 38516017  | IRF2 |     |
| 2  | 3650123   | 3650140   | 3649831   | 3650344   | IRF2 | Val |
| 18 | 4260237   | 4260254   | 4259941   | 4260346   | IRF2 |     |
| 9  | 123172686 | 123172703 | 123172146 | 123172853 | IRF2 | Val |
| 6  | 114060092 | 114060109 | 114057271 | 114060819 | IRF2 | Val |
| 17 | 30595649  | 30595666  | 30594656  | 30595886  | IRF2 |     |
| 12 | 45896954  | 45896971  | 45896271  | 45897102  | IRF2 | Val |
| 1  | 56372218  | 56372235  | 56371852  | 56372713  | IRF2 | Val |
| 18 | 35966570  | 35966587  | 35966173  | 35966894  | IRF2 | Val |
| 6  | 32712864  | 32712881  | 32712824  | 32713457  | IRF2 | Val |
| 19 | 6877316   | 6877333   | 6877077   | 6877531   | IRF2 | Val |
| 6  | 30002836  | 30002853  | 30001843  | 30003189  | IRF2 | Val |
| 12 | 79072228  | 79072245  | 79072138  | 79072573  | IRF2 |     |
| 16 | 80428049  | 80428066  | 80427712  | 80428894  | IRF2 | Val |
| 1  | 204454585 | 204454602 | 204454224 | 204455048 | IRF2 | Val |
| 6  | 87964199  | 87964216  | 87964110  | 87964488  | IRF2 |     |
| 14 | 30394377  | 30394394  | 30394230  | 30394995  | IRF2 | Val |
| 16 | 21972920  | 21972937  | 21972652  | 21973055  | IRF2 |     |
| 20 | 23044534  | 23044551  | 23044305  | 23044707  | IRF2 |     |
| 7  | 7712604   | 7712621   | 7712139   | 7712899   | IRF2 | Val |
| 10 | 94651751  | 94651768  | 94651700  | 94652056  | IRF2 |     |
| 18 | 5244068   | 5244085   | 5243905   | 5244438   | IRF2 |     |
| 6  | 30017903  | 30017920  | 30017788  | 30019092  | IRF2 | Val |
| 10 | 102446319 | 102446336 | 102446237 | 102446864 | IRF2 |     |
| 12 | 44858515  | 44858532  | 44857029  | 44858687  | IRF2 | Val |
| 8  | 137005032 | 137005049 | 137004176 | 137005425 | IRF2 | Val |



|    |           |           |           |           |        |     |
|----|-----------|-----------|-----------|-----------|--------|-----|
| 4  | 142450241 | 142450258 | 142450030 | 142451001 | IRF2   |     |
| 10 | 15204889  | 15204906  | 15204612  | 15205433  | IRF2   | Val |
| 4  | 185488362 | 185488379 | 185487814 | 185488601 | IRF2   | Val |
| 3  | 16394834  | 16394851  | 16394802  | 16395964  | IRF2   | Val |
| 1  | 99988246  | 99988265  | 99987674  | 99988664  | znf143 | Val |
| 12 | 94618334  | 94618353  | 94618235  | 94618715  | znf143 |     |
| 19 | 16560668  | 16560687  | 16558615  | 16561332  | znf143 | Val |
| 14 | 68038910  | 68038929  | 68038575  | 68039142  | znf143 |     |
| 5  | 124315562 | 124315581 | 124315250 | 124316138 | znf143 | Val |
| 22 | 41437619  | 41437638  | 41437447  | 41438258  | znf143 | Val |
| 14 | 88867874  | 88867893  | 88867464  | 88868566  | znf143 | Val |
| 3  | 10301154  | 10301173  | 10300952  | 10301811  | znf143 | Val |
| 10 | 103114464 | 103114483 | 103114409 | 103114841 | znf143 | Val |
| 8  | 8783851   | 8783870   | 8783837   | 8784448   | znf143 | Val |
| 3  | 114220960 | 114220979 | 114220143 | 114221810 | znf143 | Val |
| 13 | 29592553  | 29592572  | 29592230  | 29593009  | znf143 | Val |
| 20 | 62303914  | 62303933  | 62303483  | 62304050  | znf143 |     |
| 16 | 20144450  | 20144469  | 20143999  | 20144497  | znf143 | Val |
| 6  | 31692961  | 31692980  | 31692746  | 31693133  | znf143 |     |
| 7  | 1946271   | 1946290   | 1946171   | 1947215   | znf143 | Val |
| 2  | 111700560 | 111700579 | 111700531 | 111701491 | znf143 | Val |
| 10 | 109799599 | 109799618 | 109799482 | 109799811 | znf143 | Val |
| 10 | 11781085  | 11781104  | 11780980  | 11781837  | znf143 | Val |
| 1  | 204454560 | 204454579 | 204454224 | 204455048 | znf143 | Val |
| 13 | 93122086  | 93122105  | 93121548  | 93122184  | znf143 |     |
| 11 | 33358255  | 33358274  | 33358019  | 33358506  | znf143 | Val |
| 10 | 71703289  | 71703308  | 71702252  | 71703371  | znf143 | Val |
| 15 | 48435222  | 48435241  | 48433464  | 48435387  | znf143 | Val |
| 17 | 72105228  | 72105247  | 72104976  | 72105405  | znf143 | Val |

|    |           |           |           |           |        |     |
|----|-----------|-----------|-----------|-----------|--------|-----|
| 4  | 183967538 | 183967557 | 183966591 | 183967830 | znf143 | Val |
| 4  | 2908815   | 2908834   | 2906916   | 2909597   | znf143 | Val |
| 10 | 5928325   | 5928344   | 5928002   | 5928707   | znf143 | Val |
| 3  | 38596236  | 38596255  | 38596194  | 38596767  | znf143 | Val |
| 12 | 102846265 | 102846284 | 102846176 | 102849452 | znf143 | Val |
| 5  | 9179543   | 9179562   | 9178977   | 9180028   | znf143 | Val |
| 10 | 5934640   | 5934659   | 5934107   | 5934846   | znf143 | Val |
| 1  | 176801759 | 176801778 | 176801543 | 176802453 | znf143 |     |
| 22 | 21607297  | 21607316  | 21607222  | 21608397  | znf143 | Val |
| 6  | 137093516 | 137093535 | 137093460 | 137094018 | znf143 | Val |
| 10 | 133426127 | 133426146 | 133425503 | 133426551 | znf143 | Val |
| 18 | 3236460   | 3236479   | 3235720   | 3239158   | znf143 | Val |
| 3  | 13038588  | 13038607  | 13036858  | 13040175  | znf143 | Val |
| 4  | 1980763   | 1980781   | 1980238   | 1981251   | CTCF   | Val |
| 15 | 97313903  | 97313921  | 97313005  | 97314267  | CTCF   | Val |
| 5  | 135446215 | 135446233 | 135445576 | 135446678 | CTCF   | Val |
| 15 | 19963626  | 19963644  | 19962301  | 19964022  | CTCF   | Val |
| 15 | 19962390  | 19962408  | 19962301  | 19964022  | CTCF   | Val |
| 15 | 19963626  | 19963644  | 19962301  | 19964022  | CTCF   | Val |
| 15 | 19962390  | 19962408  | 19962301  | 19964022  | CTCF   | Val |
| 15 | 19963626  | 19963644  | 19962301  | 19964022  | CTCF   | Val |
| 10 | 79141432  | 79141450  | 79139547  | 79141636  | CTCF   | Val |
| 3  | 169717924 | 169717942 | 169717913 | 169718651 | CTCF   | Val |
| 8  | 145080547 | 145080565 | 145079784 | 145080733 | CTCF   | Val |
| 4  | 102159496 | 102159514 | 102159020 | 102160586 | CTCF   | Val |
| 13 | 46140754  | 46140772  | 46139940  | 46140838  | CTCF   | Val |
| 17 | 59378029  | 59378047  | 59376818  | 59378179  | CTCF   | Val |
| 18 | 30156836  | 30156854  | 30156164  | 30157019  | CTCF   | Val |
| 22 | 48704838  | 48704856  | 48704727  | 48706145  | CTCF   | Val |

|    |           |           |           |           |      |     |
|----|-----------|-----------|-----------|-----------|------|-----|
| 18 | 54344846  | 54344864  | 54343814  | 54345265  | CTCF |     |
| 4  | 908613    | 908631    | 907838    | 909101    | CTCF | Val |
| 1  | 197317553 | 197317571 | 197317311 | 197317947 | CTCF |     |
| 1  | 109090743 | 109090761 | 109090392 | 109091681 | CTCF | Val |
| 16 | 46096456  | 46096474  | 46096054  | 46096890  | CTCF | Val |
| 2  | 60962321  | 60962339  | 60961258  | 60962972  | CTCF | Val |
| 1  | 38228468  | 38228486  | 38227725  | 38228692  | CTCF | Val |
| 3  | 159295815 | 159295833 | 159294838 | 159296173 | CTCF | Val |
| 2  | 58942904  | 58942922  | 58942766  | 58943370  | CTCF | Val |
| 10 | 15073498  | 15073516  | 15073368  | 15073787  | CTCF | Val |
| 19 | 6877208   | 6877226   | 6877077   | 6877531   | CTCF | Val |
| 11 | 75542067  | 75542085  | 75540697  | 75542471  | CTCF | Val |
| 6  | 32742272  | 32742290  | 32742154  | 32742754  | CTCF |     |
| 1  | 85183118  | 85183136  | 85182958  | 85183878  | CTCF | Val |
| 12 | 130143039 | 130143057 | 130142821 | 130144202 | CTCF | Val |
| 17 | 1457178   | 1457196   | 1456173   | 1457880   | CTCF | Val |
| 17 | 68521343  | 68521361  | 68521029  | 68521444  | CTCF | Val |
| 20 | 11309083  | 11309101  | 11308671  | 11309442  | CTCF | Val |
| 10 | 1675742   | 1675760   | 1675233   | 1675935   | CTCF | Val |
| 17 | 38821452  | 38821470  | 38821044  | 38822737  | CTCF | Val |
| 17 | 38822215  | 38822233  | 38821044  | 38822737  | CTCF | Val |
| 17 | 38821452  | 38821470  | 38821044  | 38822737  | CTCF | Val |
| 19 | 55706500  | 55706518  | 55705800  | 55706824  | CTCF | Val |
| 12 | 25286028  | 25286046  | 25285512  | 25286064  | CTCF | Val |
| 11 | 26586508  | 26586526  | 26585912  | 26587123  | CTCF | Val |
| 11 | 26586381  | 26586399  | 26585912  | 26587123  | CTCF | Val |
| 11 | 26586508  | 26586526  | 26585912  | 26587123  | CTCF | Val |
| 11 | 26586381  | 26586399  | 26585912  | 26587123  | CTCF | Val |
| 20 | 36988185  | 36988203  | 36987959  | 36988688  | CTCF | Val |

|    |           |           |           |           |      |     |
|----|-----------|-----------|-----------|-----------|------|-----|
| 11 | 65576245  | 65576263  | 65575886  | 65576657  | CTCF | Val |
| 11 | 75203836  | 75203854  | 75203086  | 75205951  | CTCF | Val |
| 19 | 2122250   | 2122268   | 2122156   | 2123186   | CTCF | Val |
| 1  | 40279106  | 40279124  | 40277139  | 40279630  | CTCF | Val |
| 2  | 223433920 | 223433938 | 223433665 | 223434498 | CTCF | Val |
| 11 | 120831356 | 120831374 | 120831352 | 120832141 | CTCF |     |
| 1  | 112335588 | 112335606 | 112335383 | 112335887 | CTCF | Val |
| 8  | 135802068 | 135802086 | 135800705 | 135802296 | CTCF | Val |
| 11 | 64394052  | 64394070  | 64393166  | 64394118  | CTCF | Val |
| 2  | 132749784 | 132749802 | 132748611 | 132750204 | CTCF |     |
| 9  | 136890285 | 136890303 | 136889645 | 136890573 | CTCF | Val |
| 17 | 6858415   | 6858433   | 6857204   | 6860063   | CTCF | Val |
| 2  | 129581185 | 129581203 | 129580342 | 129581492 | CTCF |     |
| 3  | 120524363 | 120524381 | 120524071 | 120525570 | CTCF | Val |
| 3  | 136000780 | 136000798 | 136000361 | 136000962 | CTCF |     |
| 16 | 10822865  | 10822883  | 10822085  | 10823149  | CTCF | Val |
| 17 | 14203382  | 14203400  | 14203209  | 14203823  | CTCF | Val |
| 17 | 68198268  | 68198286  | 68198122  | 68198542  | CTCF |     |

**Supplemental Table 3 - Individual ANOVA Results for Predictive Linear Models****Individual models:**

| Model                       | Res. Df | RSS   | $\Delta$ Df | $\Delta$ Sum of Sq | F      | Pr(>F)   |
|-----------------------------|---------|-------|-------------|--------------------|--------|----------|
| ZNF143 + CTCF<br>(Controls) | 1227    | 99247 |             |                    |        |          |
| Controls + EBF1             | 1226    | 87983 | 1           | 11264              | 156.96 | 5.71E-34 |
| Controls + E2A              | 1226    | 89646 | 1           | 9600.9             | 131.3  | 5.96E-29 |
| Controls + STAT1            | 1226    | 73007 | 1           | 26240              | 440.64 | 7.98E-84 |
| Controls + IRF2             | 1226    | 82771 | 1           | 16476              | 244.04 | 2.61E-50 |

**“Full” model:**

| Factor       | Estimate | Std. Error | t value | Pr(> t ) | 95% Confidence Int |       |
|--------------|----------|------------|---------|----------|--------------------|-------|
| ebf_ratio    | 0.092    | 0.009      | 10.079  | 5.27E-23 | 0.074              | 0.110 |
| stat1_ratio  | 0.489    | 0.037      | 13.233  | 1.85E-37 | 0.417              | 0.562 |
| e2a_ratio    | 0.162    | 0.033      | 4.862   | 1.31E-06 | 0.097              | 0.228 |
| irf2_ratio   | 0.190    | 0.028      | 6.712   | 2.92E-11 | 0.135              | 0.246 |
| ctcf_ratio   | 0.002    | 0.004      | 0.601   | 0.548    | -0.005             | 0.010 |
| znf143_ratio | -0.005   | 0.005      | -1.004  | 0.315    | -0.014             | 0.005 |

**Supplemental Table 4 - Co-Expression of Transcription Factors**

| Factor      | Correlation | 95 % Confidence Interval |        | p-value<br>(Empirical) |
|-------------|-------------|--------------------------|--------|------------------------|
| IRF2        | 0.3813      | 0.3639                   | 0.3983 | 0.04                   |
| STAT1       | 0.3621      | 0.3445                   | 0.3795 | 0.04                   |
| EBF1        | 0.3240      | 0.3058                   | 0.3419 | 0.06                   |
| CTCF        | 0.1178      | 0.0979                   | 0.1376 | 0.19                   |
| E2A         | 0.1091      | 0.0891                   | 0.1289 | 0.22                   |
| ZNF143      | 0.0821      | 0.0621                   | 0.1022 | 0.25                   |
| Mean Random | -0.0265     |                          |        |                        |
| SD Random   | 0.1952      |                          |        |                        |
| Sample Size | 100         |                          |        |                        |

**Supplemental Table 5 - Functional Enrichment of Overlapping TF Binding Sites**

| Factor           | Term                                                               | Raw P-Value | FDR Q-Val | Fold Enrichment |
|------------------|--------------------------------------------------------------------|-------------|-----------|-----------------|
| IRF2 (not STAT1) | cell-cell signaling                                                | 9.92E-05    | 0.711     | 2.001613        |
| IRF2 (not STAT1) | synaptic transmission                                              | 0.001012    | 0.907     | 2.354839        |
| IRF2 (not STAT1) | positive regulation of lymphocyte mediated immunity                | 0.012195    | 1         | 2.060484        |
| IRF2 (not STAT1) | negative regulation of protein transport                           | 0.012195    | 1         | 2.060484        |
| IRF2 (not STAT1) | regulation of G-protein coupled receptor protein signaling pathway | 0.013597    | 1         | 2.354839        |
| IRF2 (not STAT1) | positive regulation of cell cycle                                  | 0.013597    | 1         | 2.354839        |
| IRF2 (not STAT1) | cellular biogenic amine metabolic process                          | 0.013597    | 1         | 2.354839        |
| IRF2 (not STAT1) | anterior/posterior pattern formation                               | 0.013597    | 1         | 2.354839        |
| IRF2 (not STAT1) | segmentation                                                       | 0.013597    | 1         | 2.354839        |
| IRF2 (not STAT1) | response to calcium ion                                            | 0.025643    | 1         | 2.018433        |
| IRF2 (not STAT1) | negative regulation of intracellular protein transport             | 0.025643    | 1         | 2.018433        |
| IRF2 (not STAT1) | negative regulation of intracellular transport                     | 0.025643    | 1         | 2.018433        |
| IRF2 (not STAT1) | regulation of chromosome organization                              | 0.025643    | 1         | 2.018433        |
| IRF2 (not STAT1) | negative regulation of Wnt receptor signaling pathway              | 0.025643    | 1         | 2.018433        |

|                  |                                                        |          |   |          |
|------------------|--------------------------------------------------------|----------|---|----------|
| IRF2 (not STAT1) | protein heterooligomerization                          | 0.025643 | 1 | 2.018433 |
| IRF2 (not STAT1) | negative regulation of nucleocytoplasmic transport     | 0.025643 | 1 | 2.018433 |
| IRF2 (not STAT1) | membrane depolarization                                | 0.032219 | 1 | 2.354839 |
| IRF2 (not STAT1) | digestive system development                           | 0.032219 | 1 | 2.354839 |
| IRF2 (not STAT1) | regulation of canonical Wnt receptor signaling pathway | 0.032219 | 1 | 2.354839 |
| IRF2 (not STAT1) | protein K63-linked deubiquitination                    | 0.032219 | 1 | 2.354839 |
| STAT1 (not IRF2) | activation of protein kinase activity                  | 0.007973 | 1 | 3.328125 |
| STAT1 (not IRF2) | tube development                                       | 0.01015  | 1 | 2.329687 |
| STAT1 (not IRF2) | tissue morphogenesis                                   | 0.020858 | 1 | 2.117898 |
| STAT1 (not IRF2) | morphogenesis of an epithelium                         | 0.024635 | 1 | 2.21875  |
| STAT1 (not IRF2) | T cell activation                                      | 0.024635 | 1 | 2.21875  |
| STAT1 (not IRF2) | regulation of cytokine production                      | 0.024635 | 1 | 2.21875  |
| STAT1 (not IRF2) | T cell proliferation                                   | 0.02683  | 1 | 3.328125 |
| STAT1 (not IRF2) | regulation of cytokine biosynthetic process            | 0.02683  | 1 | 3.328125 |
| STAT1 (not IRF2) | regulation of interferon-gamma production              | 0.02683  | 1 | 3.328125 |
| STAT1 (not IRF2) | vitamin biosynthetic process                           | 0.02683  | 1 | 3.328125 |



|                  |                                            |          |   |          |
|------------------|--------------------------------------------|----------|---|----------|
| STAT1 (not IRF2) | water-soluble vitamin biosynthetic process | 0.02683  | 1 | 3.328125 |
| STAT1 (not IRF2) | water-soluble vitamin metabolic process    | 0.02683  | 1 | 3.328125 |
| STAT1 (not IRF2) | tube morphogenesis                         | 0.028272 | 1 | 2.377232 |
| STAT1 (not IRF2) | lymphocyte proliferation                   | 0.030424 | 1 | 2.6625   |
| STAT1 (not IRF2) | leukocyte proliferation                    | 0.030424 | 1 | 2.6625   |
| STAT1 (not IRF2) | mononuclear cell proliferation             | 0.030424 | 1 | 2.6625   |
